# Supplementary material
Source: Springer Nature journal article supplement (https://www.springermedizin.de/resource/supplementary/12935_2012_370_MOESM4_ESM.pdf/9540406)

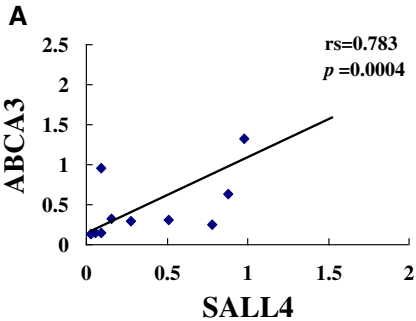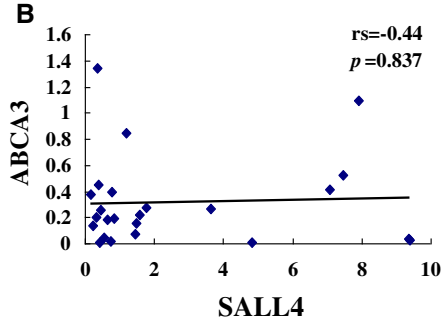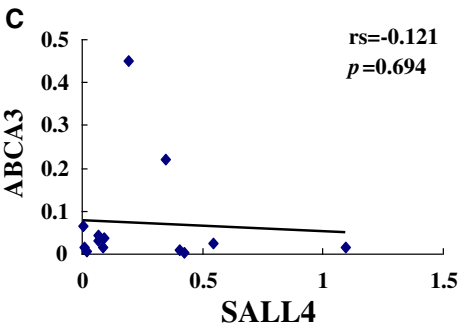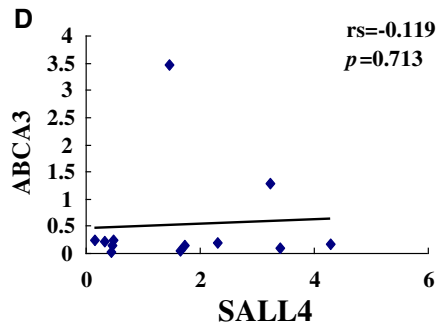

Supplement: MOESM4 [file 9540406]
